# Supplementary material for: Hardware acceleration of DNA pattern matching using analog resistive CAMs
Source: Frontiers journal article supplement (doi:10.3389/felec.2023.1343612), 2024-02-12
Supplement: Data_Sheet_1.pdf [file Data_Sheet_1.pdf]

# Supplementary Material for DNA Pattern Matching Acceleration with Analog CAMs

## Supplementary Note S1: Block Selector Implementation

The first block selector takes an input  $i$  and selects the  $i^{th}$  block and all the blocks above it. On the other hand, block selector 2 with an input equal to  $i$  selects the  $i^{th}$  block and all the blocks below it, as illustrated in the truth Tables S1 and S2 of block selectors 1 and 2, respectively. Figure S1 shows the implementation of the two block selectors.

**Table S1.** Truth Table for Block Selector 1

| Input |       |       | Outputs |       |       |       |       |       |       |       |
|-------|-------|-------|---------|-------|-------|-------|-------|-------|-------|-------|
| $A_2$ | $A_1$ | $A_0$ | $X_0$   | $X_1$ | $X_2$ | $X_3$ | $X_4$ | $X_5$ | $X_6$ | $X_7$ |
| 0     | 0     | 0     | 1       | 0     | 0     | 0     | 0     | 0     | 0     | 0     |
| 0     | 0     | 1     | 1       | 1     | 0     | 0     | 0     | 0     | 0     | 0     |
| 0     | 1     | 0     | 1       | 1     | 1     | 0     | 0     | 0     | 0     | 0     |
| 0     | 1     | 1     | 1       | 1     | 1     | 1     | 0     | 0     | 0     | 0     |
| 1     | 0     | 0     | 1       | 1     | 1     | 1     | 1     | 0     | 0     | 0     |
| 1     | 0     | 1     | 1       | 1     | 1     | 1     | 1     | 1     | 0     | 0     |
| 1     | 1     | 0     | 1       | 1     | 1     | 1     | 1     | 1     | 1     | 0     |
| 1     | 1     | 1     | 1       | 1     | 1     | 1     | 1     | 1     | 1     | 1     |

**Table S2.** Truth Table for Block Selector 2

| Input |       |       | Outputs |       |       |       |       |       |       |       |
|-------|-------|-------|---------|-------|-------|-------|-------|-------|-------|-------|
| $B_2$ | $B_1$ | $B_0$ | $Y_0$   | $Y_1$ | $Y_2$ | $Y_3$ | $Y_4$ | $Y_5$ | $Y_6$ | $Y_7$ |
| 0     | 0     | 0     | 1       | 1     | 1     | 1     | 1     | 1     | 1     | 1     |
| 0     | 0     | 1     | 0       | 1     | 1     | 1     | 1     | 1     | 1     | 1     |
| 0     | 1     | 0     | 0       | 0     | 1     | 1     | 1     | 1     | 1     | 1     |
| 0     | 1     | 1     | 0       | 0     | 0     | 1     | 1     | 1     | 1     | 1     |
| 1     | 0     | 0     | 0       | 0     | 0     | 0     | 1     | 1     | 1     | 1     |
| 1     | 0     | 1     | 0       | 0     | 0     | 0     | 0     | 1     | 1     | 1     |
| 1     | 1     | 0     | 0       | 0     | 0     | 0     | 0     | 0     | 1     | 1     |
| 1     | 1     | 1     | 0       | 0     | 0     | 0     | 0     | 0     | 0     | 1     |

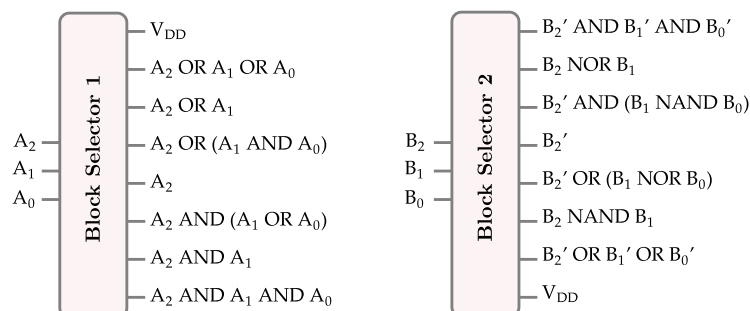

**Figure S1.** Block Selectors Implementation.

### Supplementary Note S2: Pattern Detector

Figure S2 shows the implementation of the block for pointer  $i$ , which consists of a counter, comparator, and maximum register to store the maximum value of the pattern occurrences traversed by pointer  $i$ .

Figure S3 illustrates the implementation of the comparison logic block diagram, where the maximum values of pattern occurrences corresponding to pointers 1 and 2 are first compared. The maximum among them is then compared with the maximum corresponding to pointer 3, and finally, the global maximum is stored in the global max register.

The state-transition table for the finite state machine is shown in Table S3. The next state and outputs are determined depending on the current state and input  $xD$ .

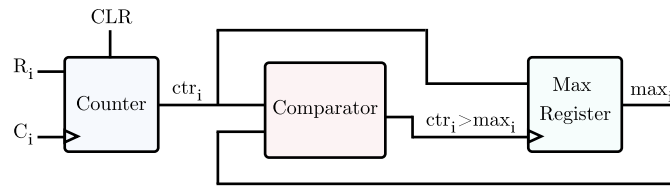

**Figure S2.** Block for Pointer  $i$ .

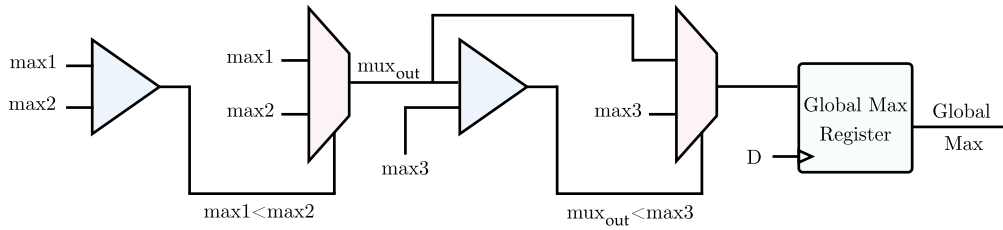

**Figure S3.** Comparison Logic Block Diagram.

**Table S3.** State-Transition Table for the proposed finite state machine

| Current State | Next State |         |         |         | Outputs |    |    |    |    |    |     |
|---------------|------------|---------|---------|---------|---------|----|----|----|----|----|-----|
|               | $xD=00$    | $xD=01$ | $xD=10$ | $xD=11$ | C1      | C2 | C3 | R1 | R2 | R3 | CLR |
| Initial       | S1         | Exit    | S2      | Exit    | 0       | 0  | 0  | 0  | 0  | 0  | 1   |
| S1            | S3         | Exit    | S4      | Exit    | 0       | 0  | 0  | 1  | 0  | 0  | 0   |
| S2            | S3         | Exit    | S4      | Exit    | 1       | 0  | 0  | 0  | 0  | 0  | 0   |
| S3            | S5         | Exit    | S6      | Exit    | 0       | 0  | 0  | 0  | 1  | 0  | 0   |
| S4            | S5         | Exit    | S6      | Exit    | 0       | 1  | 0  | 0  | 0  | 0  | 0   |
| S5            | S1         | Exit    | S2      | Exit    | 0       | 0  | 0  | 0  | 0  | 1  | 0   |
| S6            | S1         | Exit    | S2      | Exit    | 0       | 0  | 1  | 0  | 0  | 0  | 0   |
| Exit          | Exit       | Exit    | Exit    | Exit    | 0       | 0  | 0  | 0  | 0  | 0  | 1   |

### Supplementary Note S3: Memory Operation Modes

In the 1T1R memory array, the values of the signals at each node (SL, X, and Y) will vary depending on the write, read, or reset mode of the memory as shown in table S4.

**Table S4.** Signal Configuration for different memory operation modes

|          | Write     | Read   | Reset       |
|----------|-----------|--------|-------------|
| SL       | $V_{set}$ | 0      | 0           |
| X        | 0/1       | 0/1    | 1           |
| Y        | 0         | open   | $V_{reset}$ |
| Read-ckt | open      | closed | open        |
